# Supplementary material
Source: PubMed Central journal article supplement (PMC9098661)

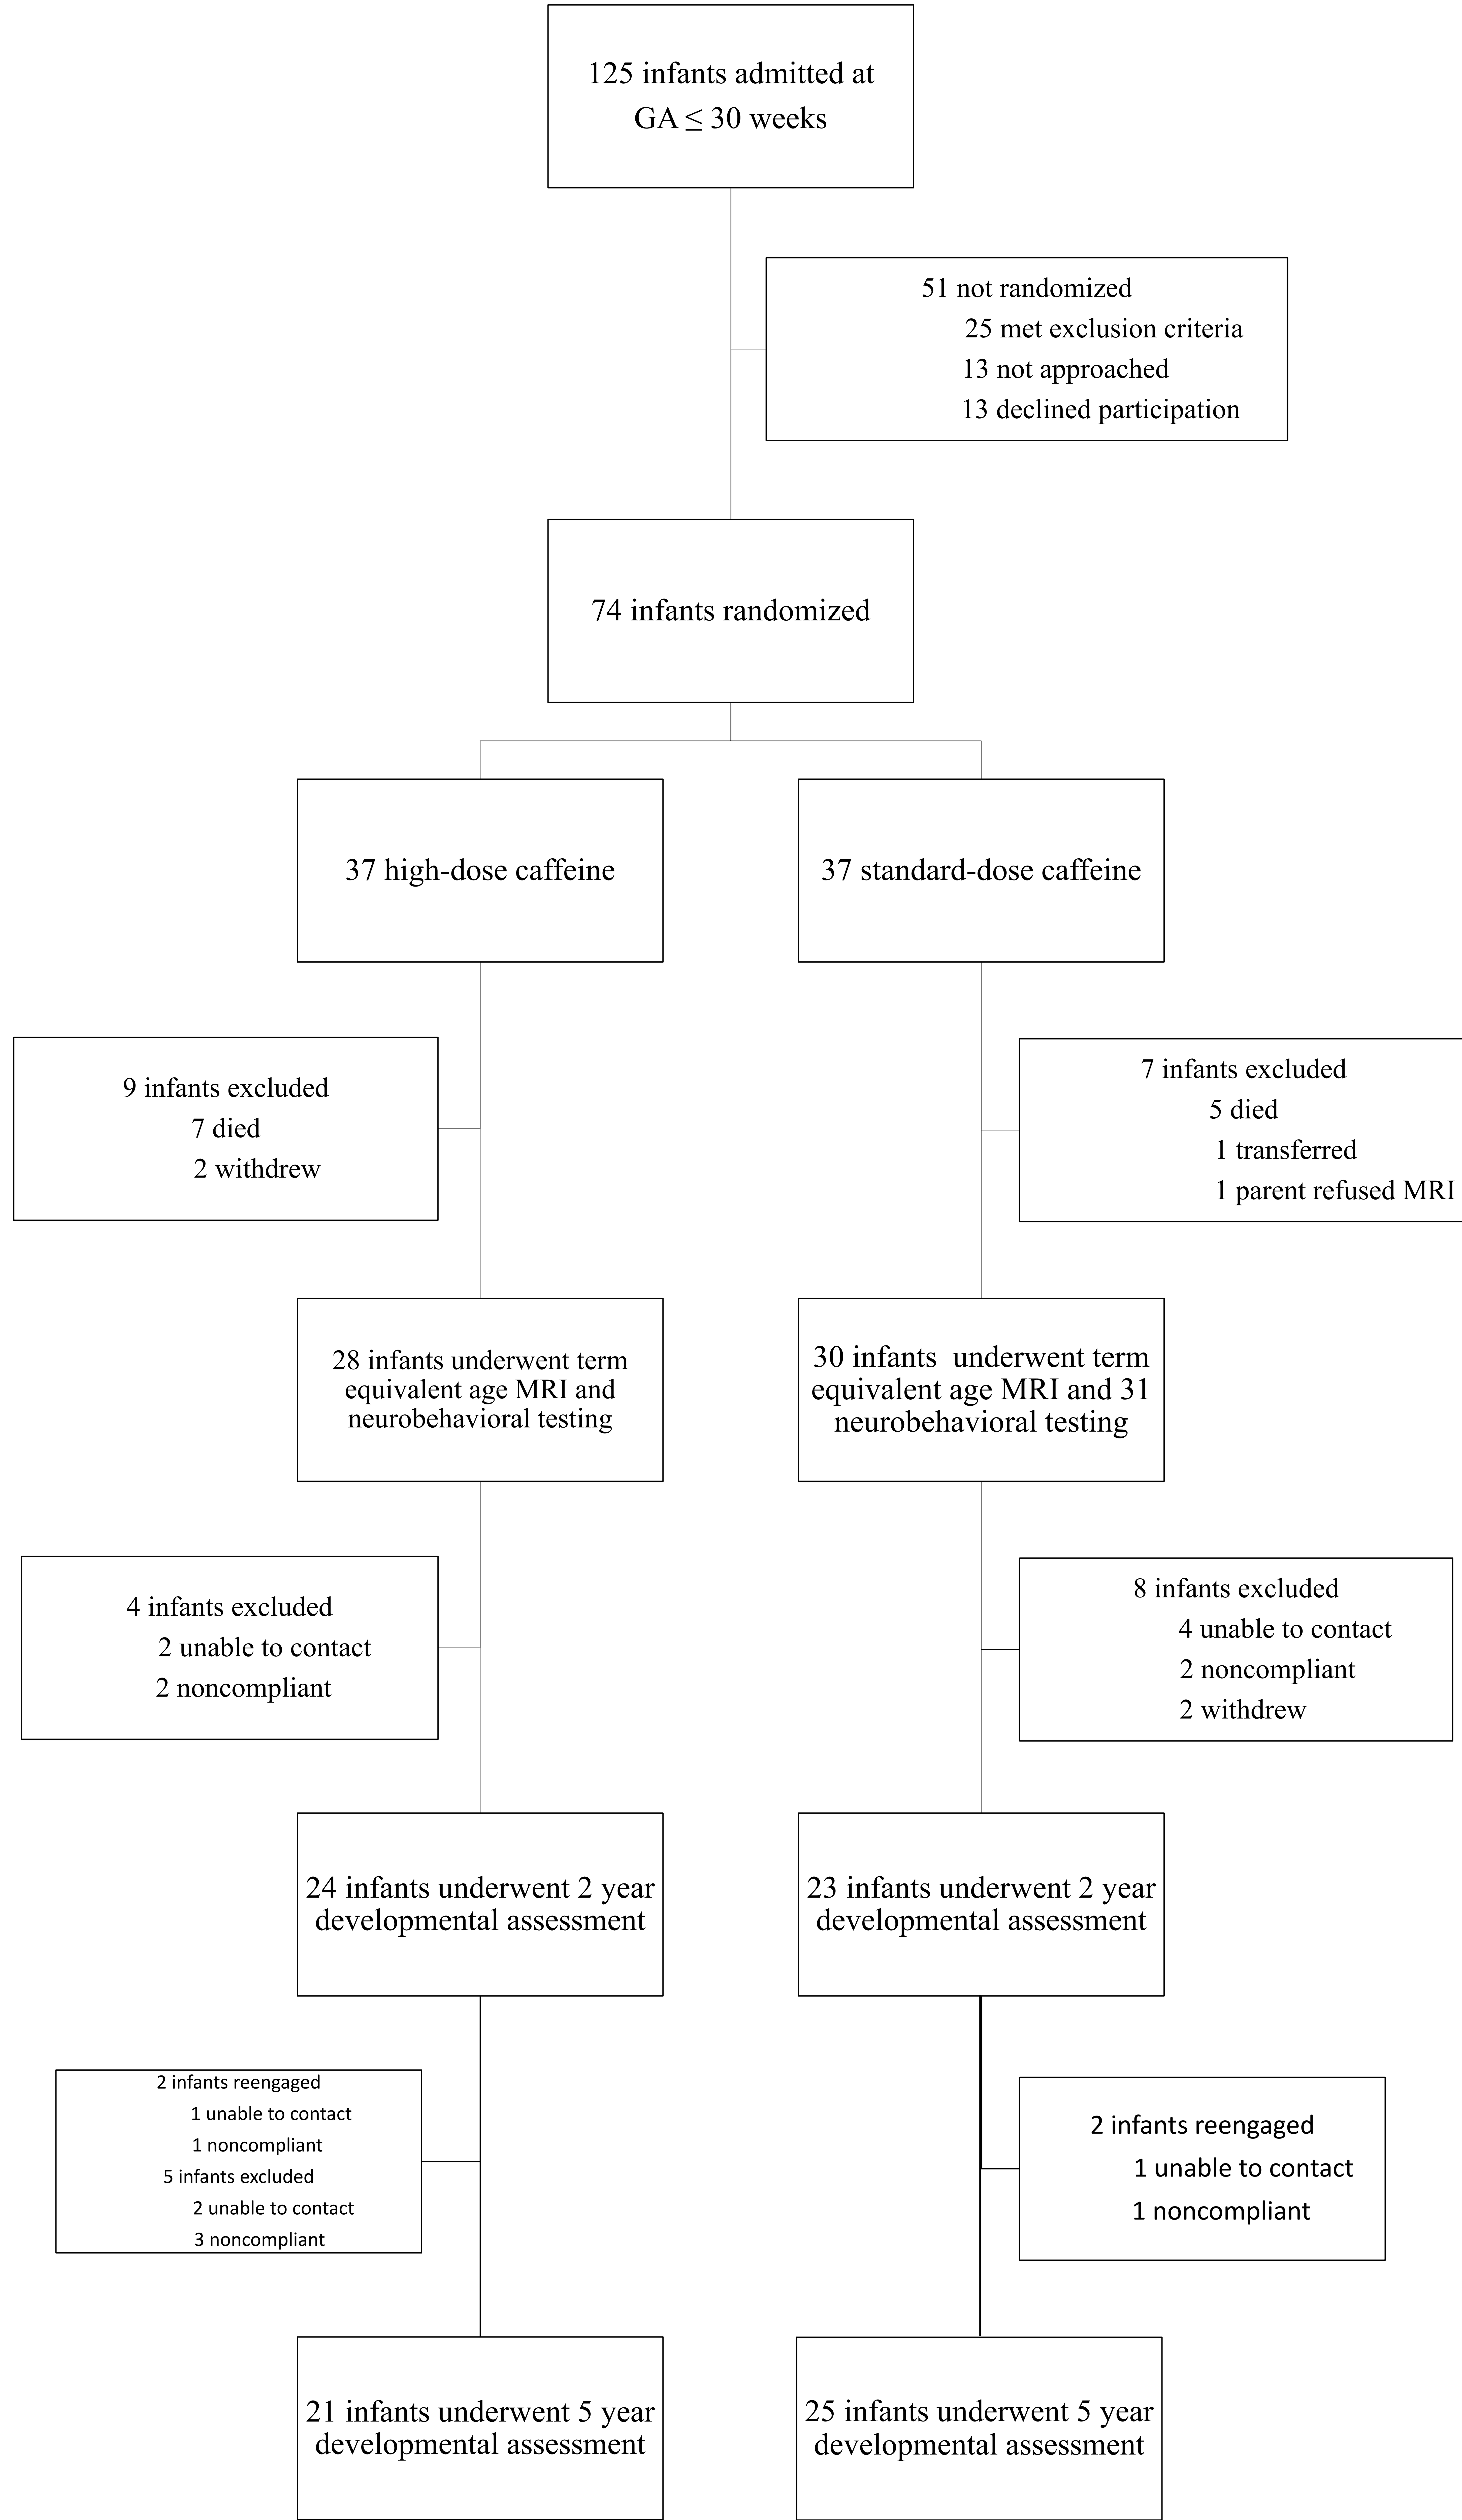

Supplement: NIHMS1775944-supplement-Supplementary_Figure_1_legend.pdf [file NIHMS1775944-supplement-Supplementary_Figure_1_legend.pdf]
